# Supplementary material for: Highly sensitive and selective fluorescence detection of Hg2+ based on turn-on aptamer DNA silver nanoclusters
Source: Royal Society of Chemistry journal article supplement (doi:10.1039/c7ra11566k), 2017-01-01
Supplement: c7ra11566k1.pdf [file c7ra11566k1.pdf]

## Supplementary material

### **Highly sensitive and selective fluorescent detection of Hg<sup>2+</sup> based on turn-on aptamer DNA silver nanoclusters**

Baozhu Zhang<sup>ab</sup> and Chunying We<sup>\*a</sup>

<sup>a</sup> Key Laboratory of Chemical Biology and Molecular Engineering of Ministry of Education, Institute of Molecular Science, Shanxi University, Taiyuan 030006, P. R. China

<sup>b</sup> College of Chemistry and Chemical Engineering, Jinzhong University, Yuci 030600, P. R. China

\*Corresponding author.

E-mail address: [weichuny@sxu.edu.cn](mailto:weichuny@sxu.edu.cn). (C. Wei)

**Table S1** Names and sequences of the oligonucleotides.

| Oligonucleotides               | Sequences (5' - 3')                                               |
|--------------------------------|-------------------------------------------------------------------|
| Hg <sup>2+</sup> -Aptamer-1    | TTCTTTCTCCCTTGTTTGT                                               |
| Hg <sup>2+</sup> -Aptamer-2    | TTTTTTTTTTTTTTTTTT                                                |
| C-Hg <sup>2+</sup> -Aptamer-1  | <b>CCCTTAATCCCC</b> <i>TTCTTTCTCCCTTGTTTGT</i>                    |
|                                | <b>CCCTTAATCCCC</b>                                               |
| C- Hg <sup>2+</sup> -Aptamer-2 | <b>CCCTTAATCCCC</b> <i>TTTTTTTTTTTTTTTTTT</i> <b>CCCTTAATCCCC</b> |

**Table S2** The lifetimes of C-Hg-Aptamer-1-AgNCs in the absence and presence of different concentration of Hg<sup>2+</sup>.

| Samples                               | [Hg <sup>2+</sup> ] (nM) | $\tau_1$ (ns)   | $\tau_2$ (ns)   | $\tau_3$ (ns)   | $\tau_{avg}$ (ns) | $\chi^2$ |
|---------------------------------------|--------------------------|-----------------|-----------------|-----------------|-------------------|----------|
| Hg Aptamer - AgNCs                    | 0                        | 0.2024 (23.62%) | 2.7054 (66.82%) | 6.7688 (9.56%)  | 2.5027            | 1.042    |
| Hg Aptamer - AgNCs + Hg <sup>2+</sup> | 5                        | 0.1751 (29.04%) | 2.6842 (59.94%) | 8.1248 (11.02%) | 2.5552            | 1.177    |
|                                       | 10                       | 0.1692 (26.42%) | 2.7768 (64.28%) | 7.9960 (9.30%)  | 2.5733            | 1.008    |
|                                       | 15                       | 0.2507 (25.76%) | 2.8119 (66.76%) | 8.6620 (7.47%)  | 2.5889            | 1.205    |

**Table S3** Comparison of optical sensors for the detection of Hg<sup>2+</sup>.

| Detection methods | Materials          | LOD (nM) | Linear range (nM) | References |
|-------------------|--------------------|----------|-------------------|------------|
| Colorimetry       | Gold nanoparticles | 35       | 0–9000            | 42         |
| Colorimetry       | Gold nanorods      | 60       | 500–25000         | 43         |
| Fluorescence      | PI/PC-AgNCs        | 3        | 500–1000          | 44         |
|                   |                    | 9        | 500–10000         |            |
| Fluorescence      | DNA-AgNCs          | 5        | 5–100             | 31         |
| Fluorescence      | DNA-AgNCs          | 4.5      | 0–150             | 32         |
| Fluorescence      | TOTO-3             | 3        | 10–200            | 45         |
| Electrochemistry  | Graphene oxide     | 1        | 1–300             | 46         |
| Fluorescence      | DNA-AgNCs          | 0.25     | 2–18              | This work  |

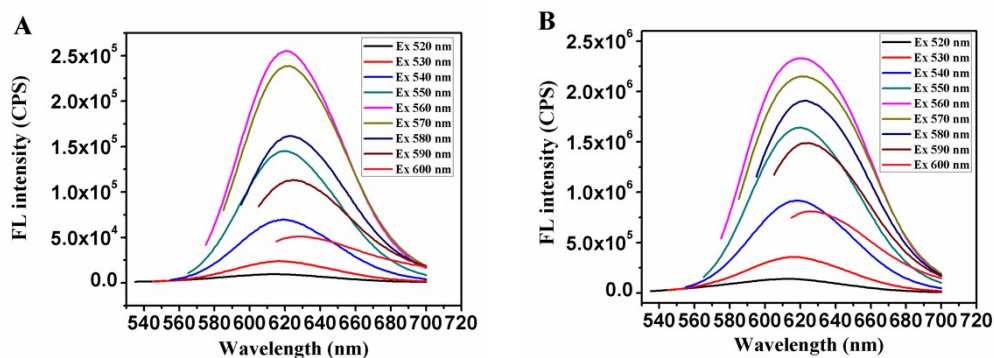**Fig. S1** Fluorescence emission spectra of C-Hg<sup>2+</sup>-Aptamer-1-Ag NCs in the absence (A) and presence (B) of 10 nM Hg<sup>2+</sup> under different excitation wavelengths.

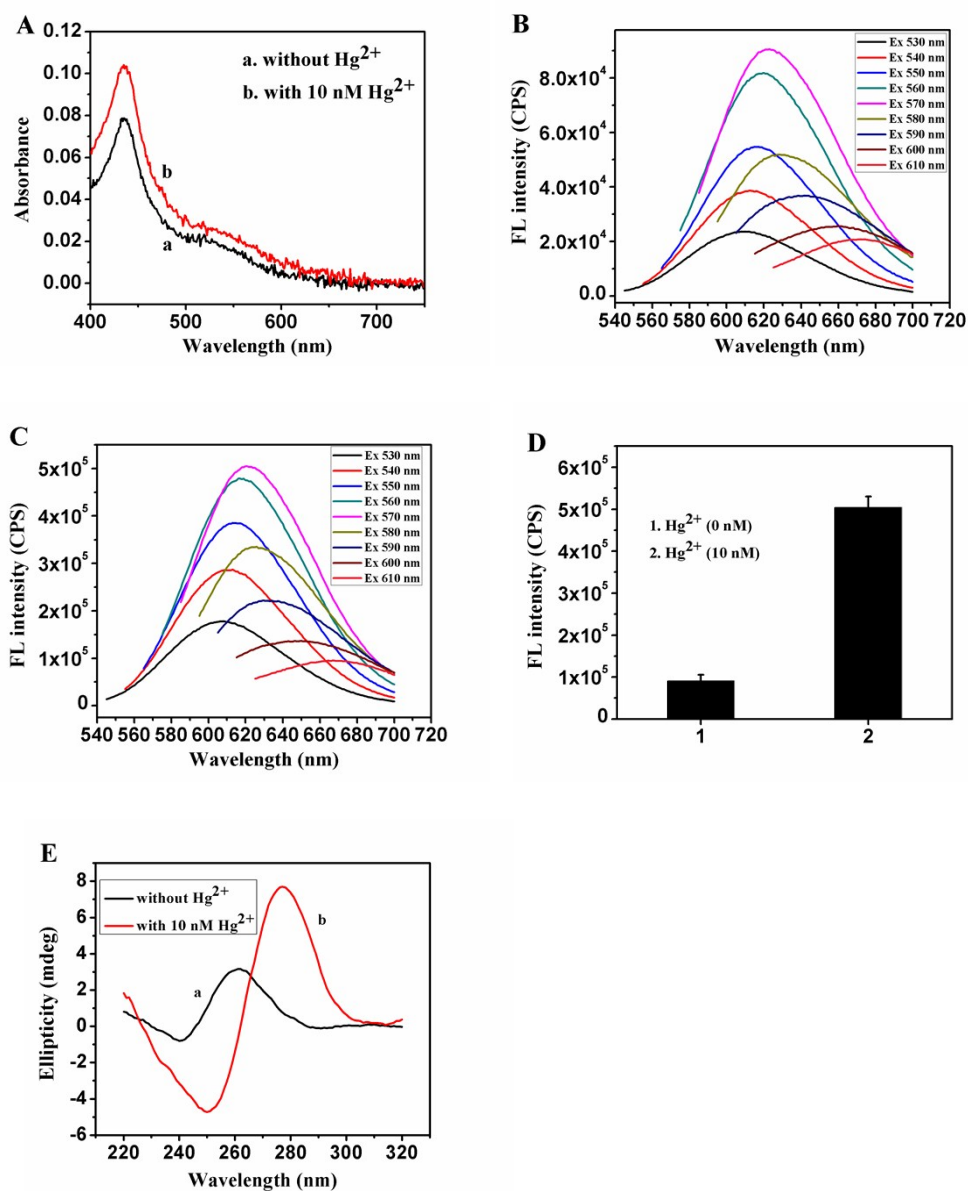

**Fig. S2** (A) UV-Vis spectra of C-Hg<sup>2+</sup>-Aptamer-2-AgNCs in the absence (a) and presence of 10 nM Hg<sup>2+</sup> (b). Fluorescence emission spectra of C-Hg<sup>2+</sup>-Aptamer-2-AgNCs (B) in the absence and (C) presence of 10 nM Hg<sup>2+</sup> under different excitation wavelengths. (D) The fluorescence intensity of C-Hg<sup>2+</sup>-Aptamer-2-AgNCs in the absence (1) and presence of 10 nM Hg<sup>2+</sup> (2). (E) CD spectra of C-Hg<sup>2+</sup>-Aptamer-2-AgNCs without (a) and with (b) 20 nM Hg<sup>2+</sup>. All measurements were performed in 20 mM PBS buffer (pH 6.3).

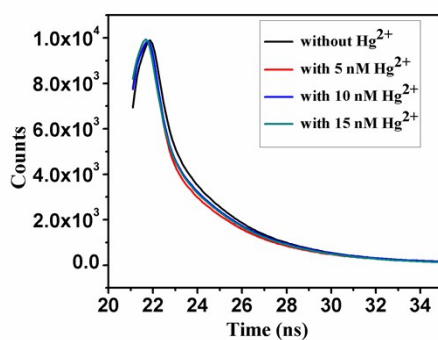

**Fig. S3** The fluorescence lifetimes of C-Hg<sup>2+</sup>-Aptamer-1-Ag NCs (excitation at 405 nm and emission at 620 nm) incubating without and with the different concentration of Hg<sup>2+</sup>.

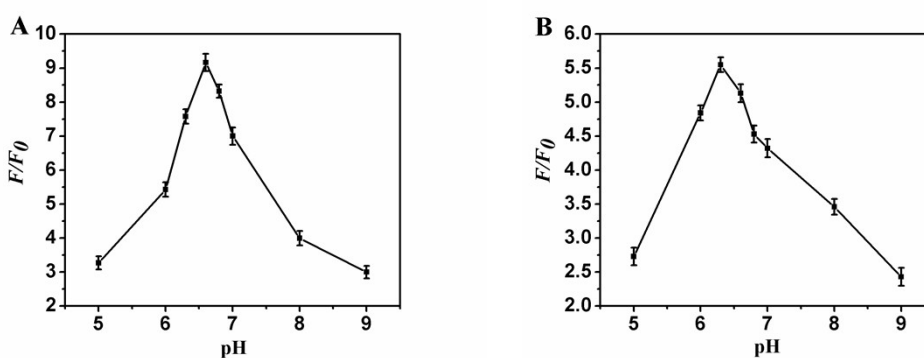

**Fig. S4** The  $F/F_0$  of (A) C-Hg<sup>2+</sup>-Aptamer-1-Ag NCs and (B) C-Hg<sup>2+</sup>-Aptamer-2-Ag NCs at different pH values.  $F_0$  and  $F$  were the maximum emission intensity of the DNA-Ag NCs incubating without and with 10 nM Hg<sup>2+</sup>, respectively.

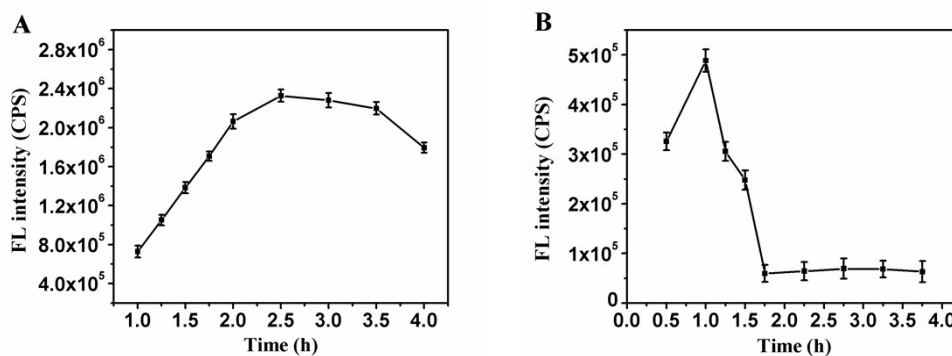

**Fig. S5** The changes of the fluorescence intensity of (A) the C-Hg<sup>2+</sup>-Aptamer-1-AgNCs and (B) the C-Hg<sup>2+</sup>-Aptamer-2-AgNCs in the presence of 10 nM Hg<sup>2+</sup> against the increasing reaction time with NaBH<sub>4</sub>.

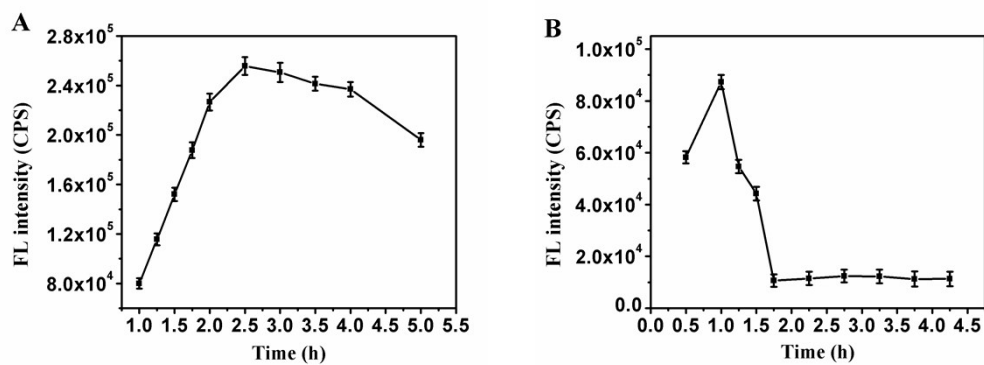

**Fig. S6** The change of fluorescence intensity of (A) the C-Hg<sup>2+</sup>-Aptamer-1-AgNCs and (B) the C-Hg<sup>2+</sup>-Aptamer-2-AgNCs probes *against* the increasing reaction time with NaBH<sub>4</sub>.

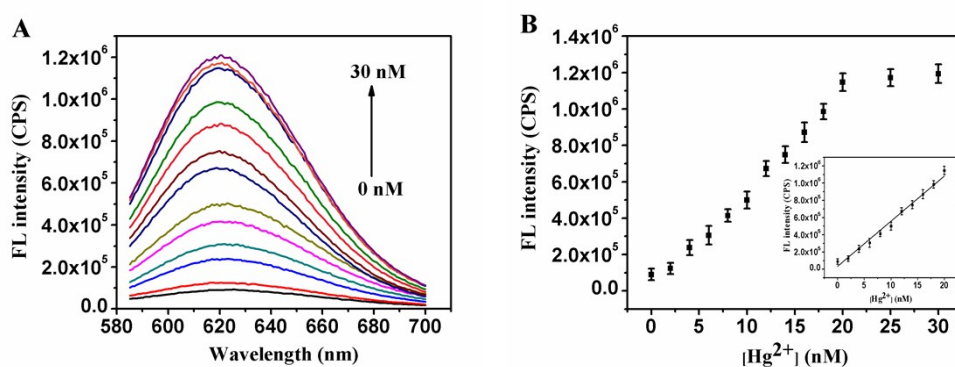

**Fig. S7** (A) Fluorescence emission spectra ( $\lambda_{\text{ex}} = 570 \text{ nm}$ ) of C-Hg-Aptamer-2-DNA-Ag NCs incubating with different concentrations of Hg<sup>2+</sup> for 1 h. (B) Fluorescence intensity as a function of Hg<sup>2+</sup> concentration. The insert showed the linear range of 2-18 nM ( $R = 0.9972$ ). The error bar represented the standard deviation of three independent measurements.
